# Supplementary material for: Photoreceptors for immediate effects of light on circadian behavior
Source: PubMed Central journal article supplement — iScience. 2024 Apr 26;27(6):109819. doi: 10.1016/j.isci.2024.109819 (PMC11103378; doi:10.1016/j.isci.2024.109819), 2024-04-26
Supplement: mmc1.pdf [file mmc1.pdf]

**iScience, Volume 27**

**Supplemental information**

**Photoreceptors for immediate  
effects of light on circadian behavior**

**Daniel Bidell, Natalie-Danielle Feige, Tilman Triphan, Claudia Müller, Dennis Pauls, Charlotte Helfrich-Förster, and Mareike Selcho**



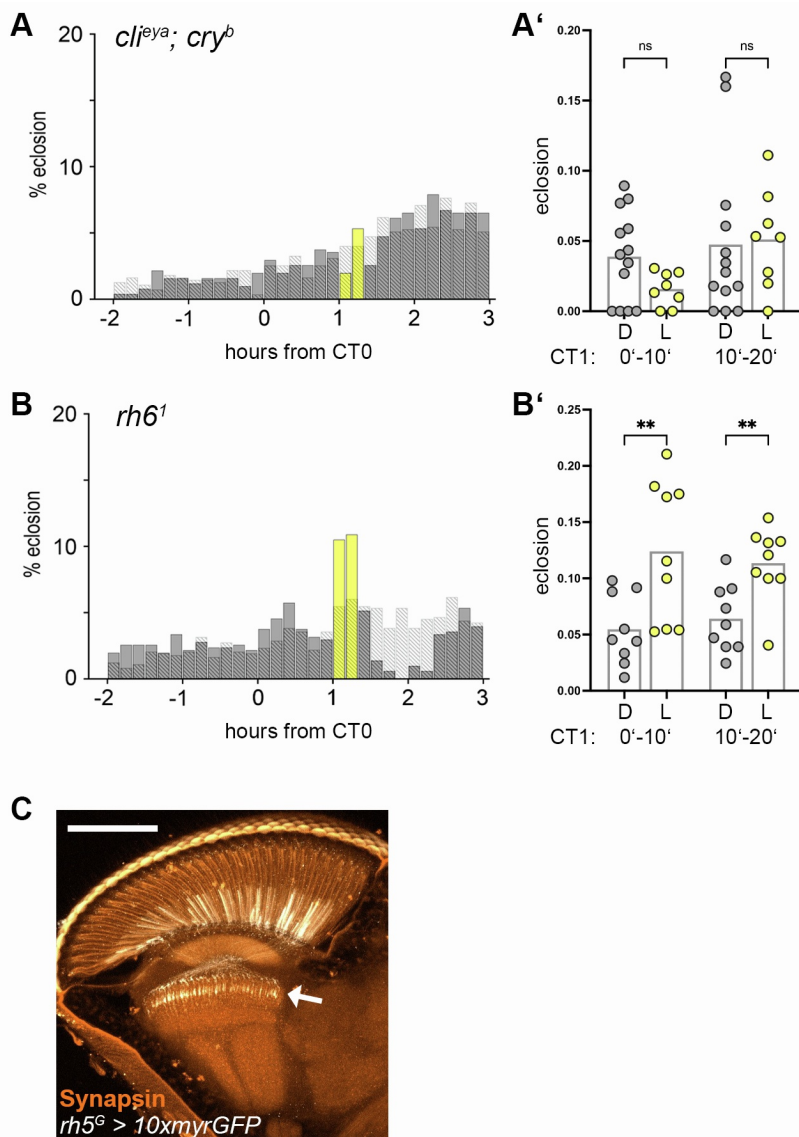

**Figure S2: The immediate light effects on eclosion behaviour, related to Figures 2 and 3. (A-A')** The light response is gone in flies lacking the compound eyes and CRY function (*clieya<sup>-</sup>; cry<sup>b</sup>*). **(B-B')** Flies without Rh6 (*rh6<sup>1</sup>*) respond to light. **(A',B')** Comparison of eclosion percentage of flies that received a 20 min light pulse (L) at circadian time (CT) 1 and the appropriate controls kept in darkness (D) in the first 10 min (0'-10') and second 10 min (10'-20') interval.  $n_{\text{exp}}, n_{\text{ctrl}} = 506, 549$  (A), 504, 731 (B). Asterisks denote level of significance:  $**p \leq 0.01$ . Data are presented as mean (bar plots) and individual values (dots). **(C)** Projection of a head section visualizing Gal4-expression in *rh5-Gal4*-positive cells. The expression can be seen in a subset of R8 cells located below R7 in the retina. The characteristic projections in medulla layer M3 are visible (arrow). Orange = anti-Synapsin; white = anti-GFP, scale bar: 100 $\mu\text{m}$ , related to Figure 3.

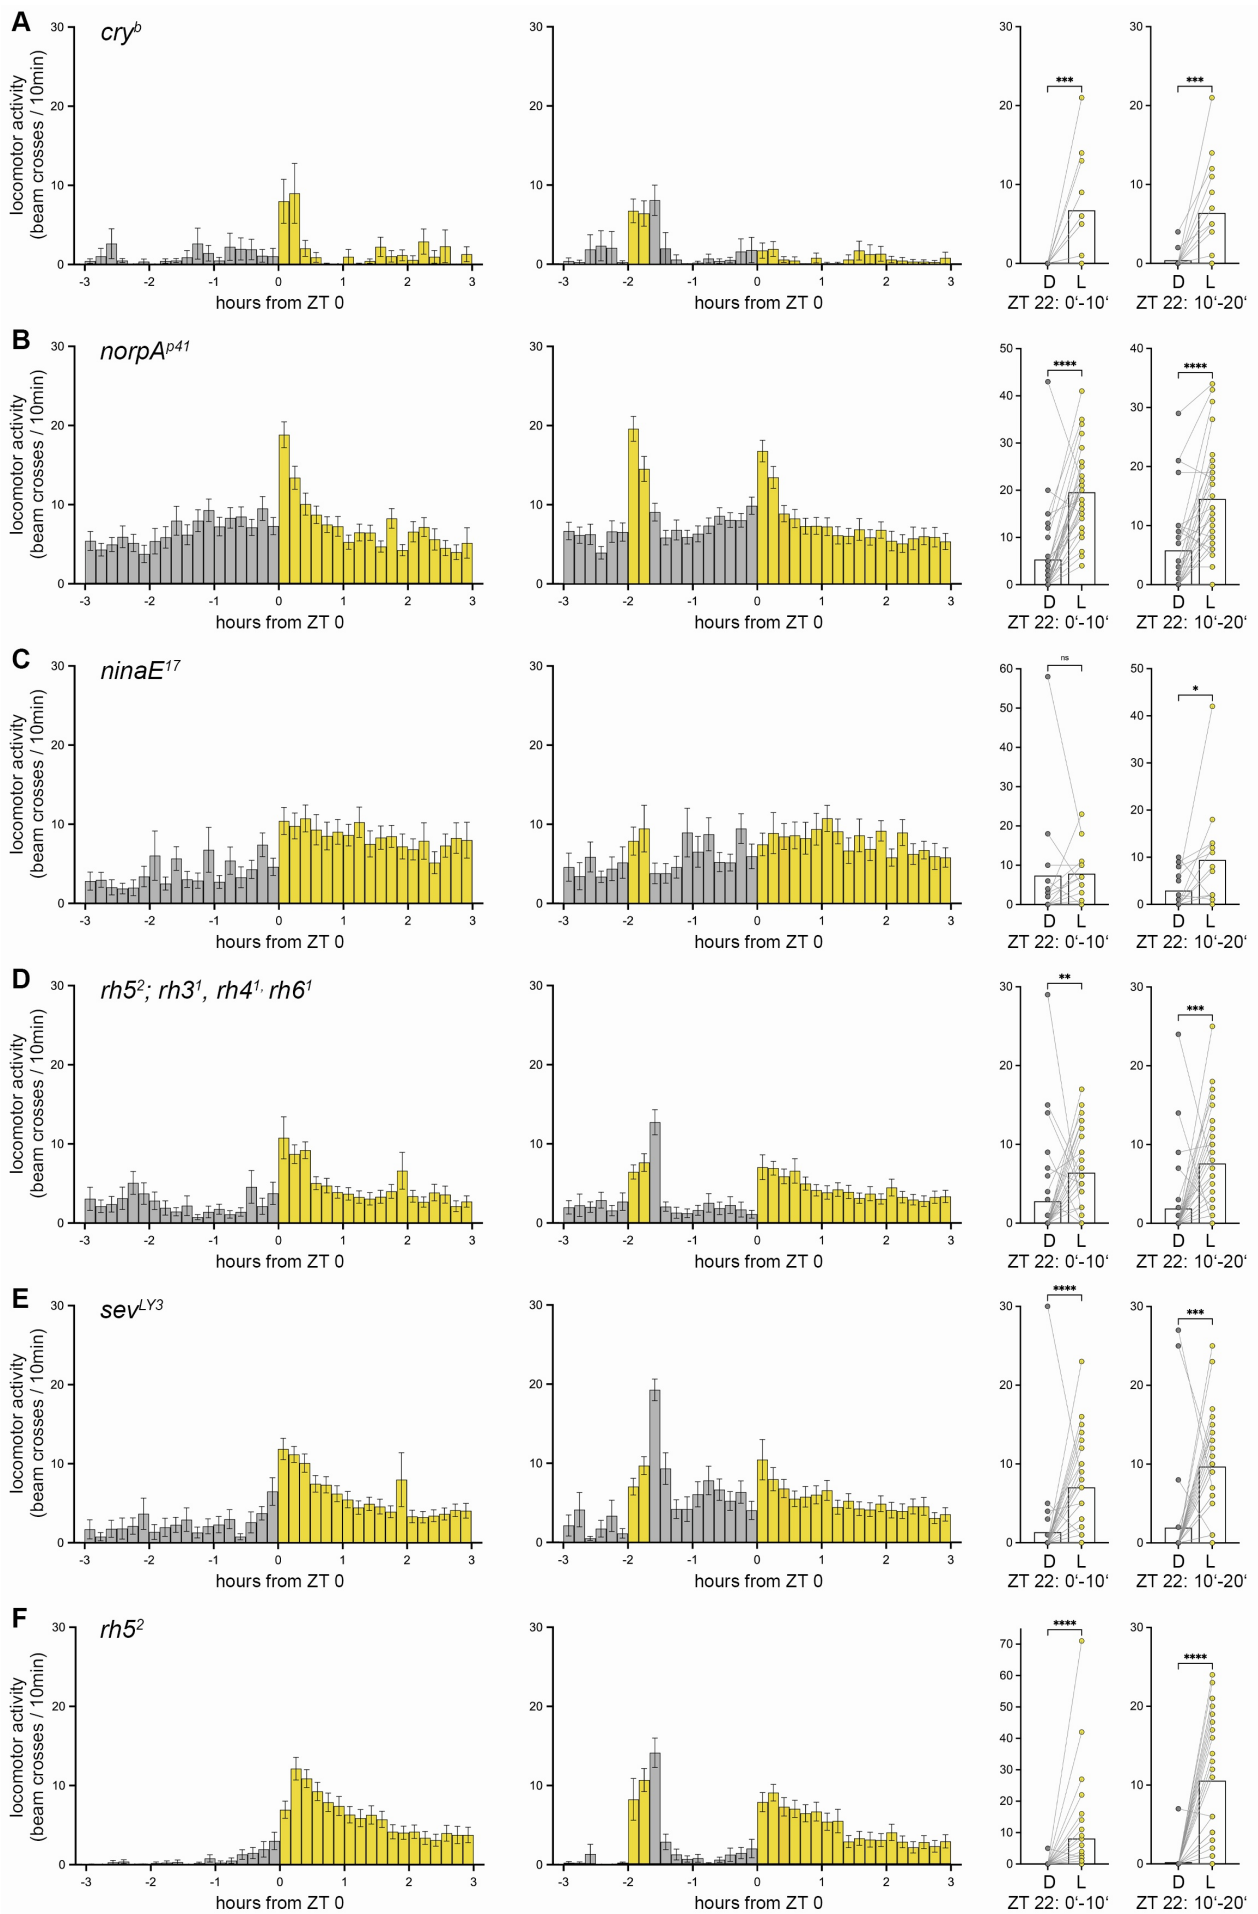

**Figure S3: The immediate light effect on locomotor activity is visible in flies lacking photosensation in Cry-positive or photoreceptor cells, related to Figure 4. (A-F)** Activity pattern in ten min intervals at the time around Zeitgeber time (ZT) 0. First and second column show bar plots of mean  $\pm$  SEM activity at the day the light pulse was applied (second column) and the activity of the same flies on the previous day (first column). The third column visualizes the comparison between the mean activity at ZT22 in 10 min intervals (0'-10' and 10'-20') during the light pulse (L) and the previous control day in darkness (D). All tested flies respond to the light pulse by a significant increase in locomotor activity compared to the appropriate controls. Data are presented as mean (bar plot) and individual values (dots). **(A)** Activity data of flies lacking Cryptochrome (*cry<sup>b</sup>*), **(B)** flies with impaired phospholipase C activity (*norpA<sup>p41</sup>*), **(C)** flies lacking Rh1(*ninaE<sup>17</sup>*), **(D)** Rh3, Rh4, Rh5 and Rh6 (*rh5<sup>2</sup>; rh3<sup>1</sup>, rh4<sup>1</sup>, rh6<sup>1</sup>*), **(E)** R7 (*sev<sup>LY3</sup>*) and **(F)** Rh5 (*rh5<sup>2</sup>*). n = 14- 32; asterisks denote level of significance: \*p $\leq$ 0.05, \*\*p $\leq$ 0.01, \*\*\*p $\leq$ 0.001, \*\*\*\*p $\leq$ 0.0001.

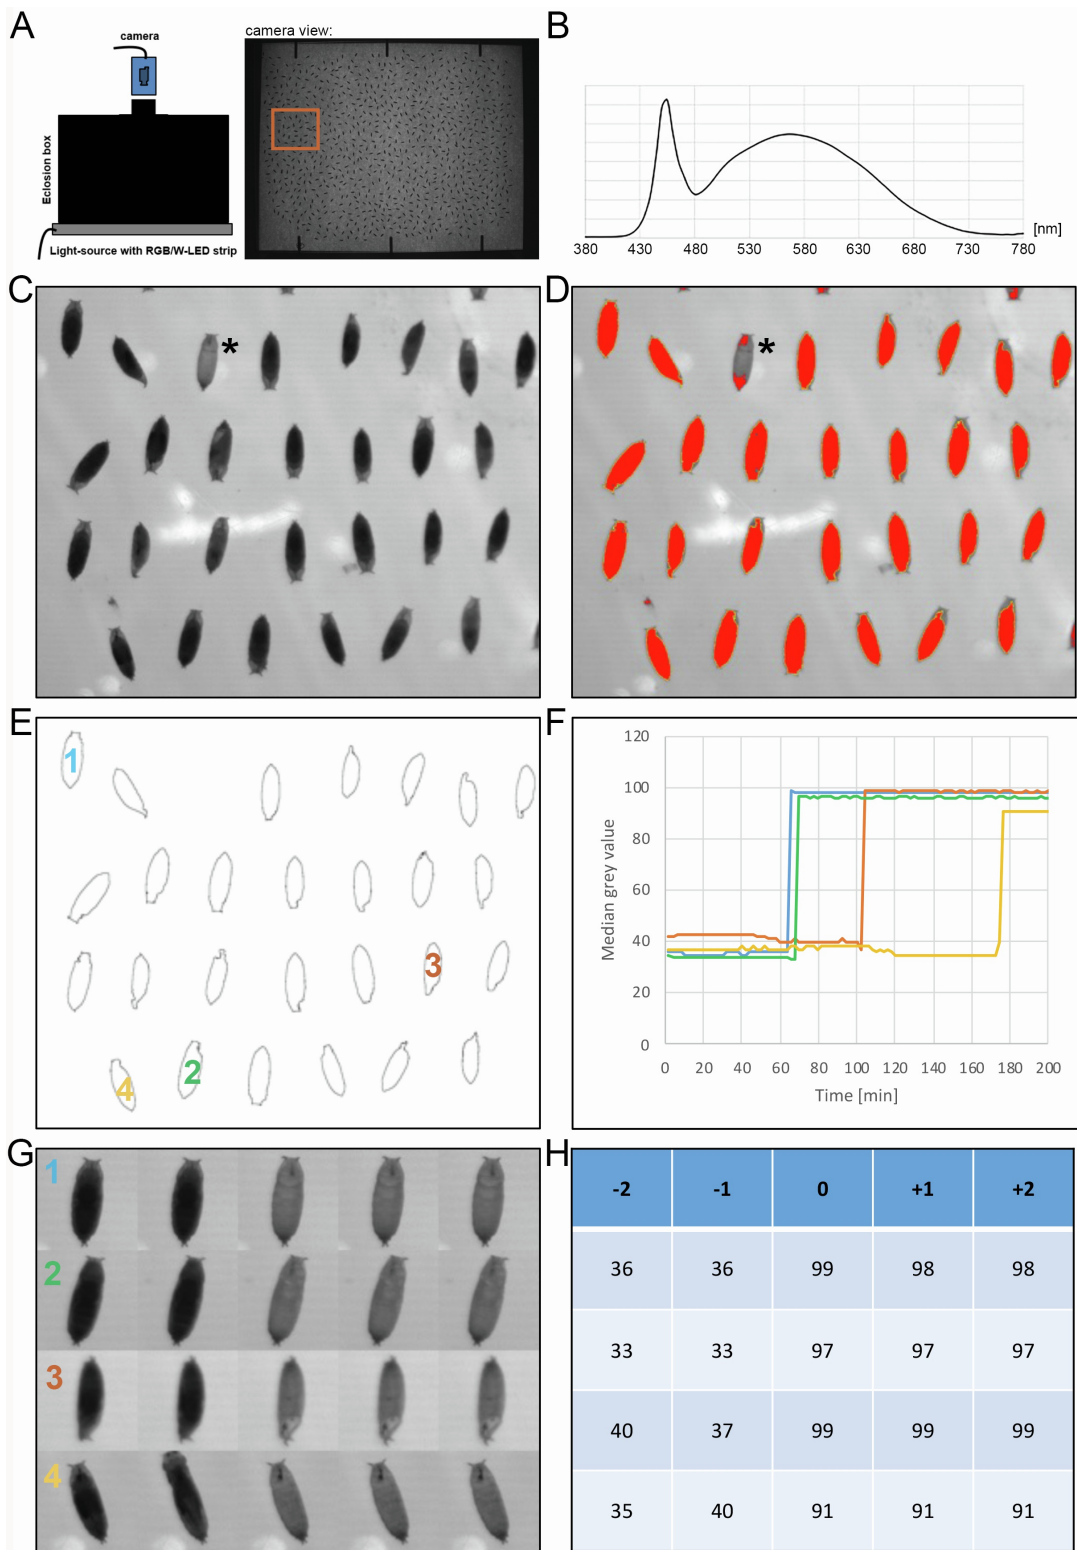

**Figure S4: Analysis of the eclosion monitor data, related to STAR Methods.** (A) Schematic overview of the eclosion box. (B) Composition of the white light. (C) Several pupae before hatching. Notice the empty pupal case marked with an asterisk. (D) Pupae are darker than the background. Pixels with a value below the threshold are coloured red. Yellow outlines mark the different objects (i.e. pupae) that fall within the given size constraints. Notice that the empty pupal case (marked with an asterisk) is excluded. (E) Outlines of the different pupae. Median grey values are calculated of each of these areas over time (i.e. for every frame). The pupae marked 1-4 are shown as examples in D-F. (F) Median grey values for pupae 1 to 4 over time. Notice the big jump in brightness from around 40 to around 100 at different points in time. (G) Montage of each 2 frames before and after hatching for 4 different pupae. In row 4 the eclosion process can be seen. (H) Median grey values for the pupae shown in E.

**Table S1. Statistical analysis of the immediate responses to light, related to Figures 4 and S1-S3.**

| Figure   | Genotype                                                                  | mean D | SEM D   | mean L | SEM L   | N D | N L | P-value  | test                      |                   |
|----------|---------------------------------------------------------------------------|--------|---------|--------|---------|-----|-----|----------|---------------------------|-------------------|
| Fig.4A   | <i>w<sup>1118</sup></i>                                                   | 4.13   | 1.34    | 31.40  | 1.80    | 32  |     | p<0.0001 | Wilcoxon signed rank test |                   |
|          |                                                                           | 6.94   | 2.00    | 27.90  | 2.08    |     |     | p<0.0001 |                           |                   |
| Fig.4B   | <i>cl<sup>eya</sup>; cry<sup>b</sup></i>                                  | 4.11   | 0.890   | 10.8   | 1.52    | 28  |     | p<0.0001 |                           |                   |
|          |                                                                           | 4.00   | 1.08    | 8.50   | 1.13    |     |     | p=0.0004 |                           |                   |
| Fig.4C   | <i>cry<sup>01</sup></i>                                                   | 2.03   | 0.817   | 8.93   | 1.90    | 30  |     | p=0.0004 |                           |                   |
|          |                                                                           | 3.53   | 1.33    | 8.33   | 1.01    |     |     | p=0.0011 |                           |                   |
| Fig.4D   | <i>rh2<sup>1</sup></i>                                                    | 2.29   | 0.988   | 8.48   | 1.49    | 31  |     | p=0.0007 |                           |                   |
|          |                                                                           | 2.29   | 1.15    | 9.39   | 1.45    |     |     | p=0.0004 |                           |                   |
| Fig.4E   | <i>rh5<sup>2</sup>; rh6<sup>1</sup></i>                                   | 2.86   | 1.28    | 9.97   | 1.22    | 29  |     | p<0.0001 |                           |                   |
|          |                                                                           | 2.07   | 0.836   | 13.2   | 1.21    |     |     | p<0.0001 |                           |                   |
| Fig.4F   | <i>hdc<sup>JK910</sup></i>                                                | 7.26   | 1.03    | 3.63   | 1.28    | 27  |     | p=0.0166 |                           |                   |
|          |                                                                           | 8.19   | 1.49    | 4.11   | 1.02    |     |     | p=0.0457 |                           |                   |
| Fig.S1A  | CS                                                                        | 0.03   | 0.0122  | 0.113  | 0.0257  | 6   | 6   | p=0.0153 | unpaired t-test           |                   |
|          |                                                                           | 0.0467 | 0.0142  | 0.124  | 0.0106  |     |     | p=0.0014 |                           |                   |
| Fig.S1B  | <i>w<sup>1118</sup></i>                                                   | 0.0470 | 0.00839 | 0.159  | 0.0203  | 10  | 9   | p<0.0001 | Mann-Whitney test         |                   |
|          |                                                                           | 0.0581 | 0.0101  | 0.0437 | 0.0102  |     |     | p=0.3318 |                           |                   |
| Fig.S1C  | <i>cl<sup>eya</sup></i>                                                   | 0.0373 | 0.00833 | 0.0396 | 0.00982 | 14  | 10  | p=0.8635 |                           |                   |
|          |                                                                           | 0.0389 | 0.0107  | 0.0520 | 0.00813 |     |     | p=0.3590 |                           |                   |
| Fig.S1D  | <i>norpA<sup>p41</sup></i>                                                | 0.0570 | 0.0130  | 0.0459 | 0.00832 | 7   | 8   | p=0.4756 |                           | unpaired t-test   |
|          |                                                                           | 0.0750 | 0.0166  | 0.0500 | 0.0113  |     |     | p=0.2261 |                           |                   |
| Fig.S1E  | <i>rh2<sup>1</sup></i>                                                    | 0.0284 | 0.0114  | 0.109  | 0.0194  | 9   | 10  | p=0.0006 |                           | Mann-Whitney test |
|          |                                                                           | 0.0466 | 0.00889 | 0.116  | 0.0172  |     |     | p=0.0029 |                           |                   |
| Fig.S1F  | <i>cry<sup>01</sup></i>                                                   | 0.0602 | 0.00770 | 0.105  | 0.0126  | 8   | 7   | p=0.0078 |                           | unpaired t-test   |
|          |                                                                           | 0.0829 | 0.0147  | 0.102  | 0.0155  |     |     | p=0.3762 |                           |                   |
| Fig.S1G  | <i>w<sup>1118</sup> (blue L)</i>                                          | 0.0841 | 0.0458  | 0.152  | 0.0119  | 7   | 8   | p=0.0040 |                           |                   |
|          |                                                                           | 0.0555 | 0.0107  | 0.0555 | 0.0129  |     |     | p=0.9975 |                           |                   |
| Fig.S1H  | <i>w<sup>1118</sup> (green L)</i>                                         | 0.0570 | 0.0103  | 0.165  | 0.0192  | 15  | 8   | p<0.0001 |                           |                   |
|          |                                                                           | 0.0493 | 0.00765 | 0.0749 | 0.0114  |     |     | p=0.0690 |                           |                   |
| Fig.S1I  | <i>w<sup>1118</sup> (red L)</i>                                           | 0.0570 | 0.0103  | 0.155  | 0.0213  | 15  | 9   | p=0.0001 |                           |                   |
|          |                                                                           | 0.0493 | 0.00765 | 0.0761 | 0.0126  |     |     | p=0.0650 |                           |                   |
| Fig.S1J  | <i>ninaE<sup>17</sup> (red L)</i>                                         | 0.0346 | 0.0106  | 0.0428 | 0.0112  | 15  | 18  | p=0.6986 | Mann-Whitney test         |                   |
|          |                                                                           | 0.0324 | 0.0113  | 0.0867 | 0.0164  |     |     | p=0.0353 |                           |                   |
| Fig.S1K  | <i>rh6<sup>1</sup> (red L)</i>                                            | 0.0547 | 0.0104  | 0.0686 | 0.0131  | 9   | 10  | p=0.4002 | unpaired t-test           |                   |
|          |                                                                           | 0.0642 | 0.0100  | 0.106  | 0.0195  |     |     | p=0.0837 |                           |                   |
| Fig.S1L  | <i>ninaE<sup>17</sup>; rh6<sup>1</sup> (red L)</i>                        | 0.0518 | 0.00987 | 0.0770 | 0.0103  | 10  | 12  | p=0.0961 |                           |                   |
|          |                                                                           | 0.0669 | 0.00835 | 0.0727 | 0.0133  |     |     | p=0.7276 |                           |                   |
| Fig.S1M  | <i>ninaE<sup>17</sup>; rh6<sup>1</sup></i>                                | 0.0518 | 0.00987 | 0.157  | 0.0252  | 10  | 10  | p=0.0011 |                           |                   |
|          |                                                                           | 0.0669 | 0.00835 | 0.144  | 0.0147  |     |     | p=0.0002 |                           |                   |
| Fig.S1N  | <i>rh5<sup>2</sup>; rh3<sup>1</sup>; rh4<sup>1</sup>; rh6<sup>1</sup></i> | 0.0465 | 0.00978 | 0.0616 | 0.0109  | 5   | 13  | p=0.4362 |                           |                   |
|          |                                                                           | 0.0364 | 0.00694 | 0.0363 | 0.0100  |     |     | p=0.9944 |                           |                   |
| Fig.S1O  | <i>sev<sup>LY3</sup></i>                                                  | 0.0472 | 0.0122  | 0.113  | 0.0159  | 8   | 10  | p=0.0067 |                           | Mann-Whitney test |
|          |                                                                           | 0.0742 | 0.0120  | 0.0874 | 0.0140  |     |     | p=0.4991 |                           |                   |
| Fig.S1P  | <i>rh5<sup>2</sup></i>                                                    | 0.0223 | 0.00638 | 0.0312 | 0.0111  | 10  | 13  | p=0.9621 | Mann-Whitney test         |                   |
|          |                                                                           | 0.0636 | 0.0128  | 0.0271 | 0.00808 |     |     | p=0.0188 |                           |                   |
| Fig.S1Q  | <i>rh5<sup>2</sup> &gt; chop2<sup>XXL</sup></i>                           | 0.0381 | 0.00685 | 0.110  | 0.0232  | 5   | 5   | p=0.0317 |                           |                   |
| Fig.S1R  | <i>UAS control</i>                                                        | 0.0308 | 0.00609 | 0.0562 | 0.0197  | 6   | 6   | p=0.2454 | unpaired t-test           |                   |
| Fig.S2A' | <i>cl<sup>eya</sup>; cry<sup>b</sup></i>                                  | 0.0389 | 0.00898 | 0.0158 | 0.00427 | 13  | 8   | p=0.0698 | unpaired t-test           |                   |
|          |                                                                           | 0.0475 | 0.0156  | 0.0511 | 0.0125  |     |     | p=0.4017 |                           |                   |
| Fig.S2B' | <i>rh6<sup>1</sup></i>                                                    | 0.0547 | 0.0104  | 0.124  | 0.0208  | 9   | 9   | p=0.0088 | unpaired t-test           |                   |
|          |                                                                           | 0.0642 | 0.0100  | 0.113  | 0.0110  |     |     | p=0.0044 |                           |                   |
| Fig.S3A  | <i>cry<sup>b</sup></i>                                                    | 0.000  | 0.000   | 6.73   | 1.50    | 15  |     | p=0.0005 | paired t-test             |                   |
|          |                                                                           | 0.400  | 0.289   | 6.40   | 1.59    |     |     | p=0.0010 |                           |                   |
| Fig.S3B  | <i>norpA<sup>p41</sup></i>                                                | 5.32   | 1.60    | 19.6   | 1.57    | 31  |     | p<0.0001 | Wilcoxon signed rank test |                   |
|          |                                                                           | 5.81   | 1.35    | 14.5   | 1.58    |     |     | p<0.0001 |                           |                   |

|         |                                                                                                       |       |       |      |       |    |          |                           |
|---------|-------------------------------------------------------------------------------------------------------|-------|-------|------|-------|----|----------|---------------------------|
| Fig.S3C | <i>ninaE</i> <sup>17</sup>                                                                            | 7.36  | 4.13  | 7.86 | 1.77  | 14 | p=0.4121 | Wilcoxon signed rank test |
|         |                                                                                                       | 2.93  | 1.02  | 9.43 | 2.94  |    | p=0.0142 |                           |
| Fig.S3D | <i>rh5</i> <sup>2</sup> ; <i>rh3</i> <sup>1</sup> ; <i>rh4</i> <sup>1</sup> ; <i>rh6</i> <sup>1</sup> | 2.78  | 1.10  | 6.41 | 0.887 | 32 | p=0.0077 |                           |
|         |                                                                                                       | 1.88  | 0.900 | 7.59 | 1.12  |    | p=0.0005 |                           |
| Fig.S3E | <i>sev</i> <sup>LY3</sup>                                                                             | 1.34  | 0.949 | 7.03 | 1.06  | 32 | p<0.0001 |                           |
|         |                                                                                                       | 1.94  | 1.15  | 9.69 | 1.13  |    | p=0.0002 |                           |
| Fig.S3F | <i>rh5</i> <sup>2</sup>                                                                               | 0.156 | 0.156 | 8.13 | 2.63  | 32 | p<0.0001 |                           |
|         |                                                                                                       | 0.219 | 0.219 | 10.6 | 1.46  |    | p<0.0001 |                           |
